# Supplementary material for: A Field Recombinant Strain Derived from Two Type 1 Porcine Reproductive and Respiratory Syndrome Virus (PRRSV-1) Modified Live Vaccines Shows Increased Viremia and Transmission in SPF Pigs
Source: MDPI journal article supplement (doi:10.3390/v11030296), 2019-03-23
Supplement: s1 [file s1]

|                 |                   | NSP1                                                                              | NSP2                                                                              | NSP3                                                                              | NSP4                                                                              | NSP5                                                                              | NSP6                                                                              | NSP7a                                                                             | NSP7b                                                                             | NSP8                                                                              | NSP9                                                                              | NSP10                                                                             | NSP11                                                                             | NSP12                                                                             |
|-----------------|-------------------|-----------------------------------------------------------------------------------|-----------------------------------------------------------------------------------|-----------------------------------------------------------------------------------|-----------------------------------------------------------------------------------|-----------------------------------------------------------------------------------|-----------------------------------------------------------------------------------|-----------------------------------------------------------------------------------|-----------------------------------------------------------------------------------|-----------------------------------------------------------------------------------|-----------------------------------------------------------------------------------|-----------------------------------------------------------------------------------|-----------------------------------------------------------------------------------|-----------------------------------------------------------------------------------|
| <b>Rec 2014</b> | Parental strain   |  |  |  |  |  |  |  |  |  |  |  |  |  |
|                 | Mutation rate (%) | 0.52                                                                              | 1.39                                                                              | 1.16                                                                              | 1.15                                                                              | 0.39                                                                              | 0.00                                                                              | 0.67                                                                              | 0.56                                                                              | 0.00                                                                              | 0.49                                                                              | 0.83                                                                              | 1.04                                                                              | 1.32                                                                              |
| <b>Rec 2016</b> | Parental strain   |  |  |  |  |  |  |  |  |  |  |  |  |  |
|                 | Mutation rate (%) | 2.01                                                                              | 2.75                                                                              | 2.17                                                                              | 1.48                                                                              | 1.76                                                                              | 0.00                                                                              | 1.79                                                                              | 3.06                                                                              | 0.74                                                                              | 1.27                                                                              | 2.34                                                                              | 2.38                                                                              | 2.19                                                                              |

 Unistrain vaccine strain  
 Porcilis vaccine strain

**Supplementary Table S1:**

**Mutation rate in non-structural proteins (NSPs) encoded by the ORF1 in the recombinant strains isolated in 2014 (Rec 2014) or 2016 (Rec 2016) compared with the parental vaccine strains.**

The recombination breakpoints occurred in NSP1, NSP2, NSP3 and NSP9 for both strains. The mutation rate was calculated from nucleotide variation encountered in nucleotide sequence of the gene encoding each protein compared to those of the corresponding parental strain. For chimeric proteins with two parental strains, the comparison was made with the corresponding parental strain according the area.
